# Supplementary material
Source: HighWire-hosted journal article supplement (https://www.annfammed.org/highwire/filestream/7560/field_highwire_adjunct_files/1/McKee_App_2.pdf)
Supplement: McKee_App_2.pdf [file McKee_App_2.pdf]

**Online Supplementary Material**

McKee MD, Karasz AK, Weber CM. Health care seeking among urban minority adolescent girls: the crisis at sexual debut. *Ann Fam Med*. 2004;2:549-554.

<http://www.annfammed.org/cgi/content/full/2/6/549/DC1>

---

## **Appendix 2. Reflexivity Process**

The team underwent a reflexivity exercise designed to expose preconceptions and expectations regarding findings before the first analysis session. The exercise was facilitated by an experienced investigator who has written extensively on qualitative methods. Each member of the team was asked to describe her motivation for involvement in this study and personal expectations regarding the findings. Each investigator described personal experiences of medical care seeking as a teenager.

The differences that emerged appeared related both to personal experience and academic perspective. Not surprisingly, our training influenced our motivation and expectations. MDK, a family physician, described the expectation that some girls would have important, meaningful relationships with health care providers, and desire to improve such relationships as a key motivator for involvement in the project. AK, a psychologist with expertise in health psychology and qualitative methods, doubted that adolescent girls would feel that relationships with health care providers were a salient topic and anticipated that the interviews would yield little interesting data on this topic. CMW, by contrast was interested in the social factors influencing interactions with health care providers, such as gender, class, and ethnicity. Preconceptions and expectations identified during the reflexivity process were revisited during the interpretive process.
